# Supplementary material for: Toxicological Evaluation toward Refined Montmorillonite with Human Colon Associated Cells and Human Skin Associated Cells
Source: MDPI journal article supplement (doi:10.3390/jfb15030075), 2024-03-20
Supplement: s1 [file s1]

## **Supporting Information**

### **Toxicological evaluation toward refined montmorillonite with human colon associated cells and human skin associated cells**

Zhou Wang<sup>1#</sup>, Yibei Jiang<sup>1#</sup>, Guangjian Tian<sup>1</sup>, Chuyu Zhu<sup>1\*</sup>, Yi Zhang<sup>1\*</sup>

1 Department of Inorganic Materials, School of Minerals Processing and Bioengineering, Central South University, Changsha 410083, China

# These authors contributed equally: Zhou Wang, Yibei Jiang

\* Corresponding authors: Chuyu Zhu (email: zhucyu@csu.edu.cn); Yi Zhang (email: yee\_z10@csu.edu.cn).

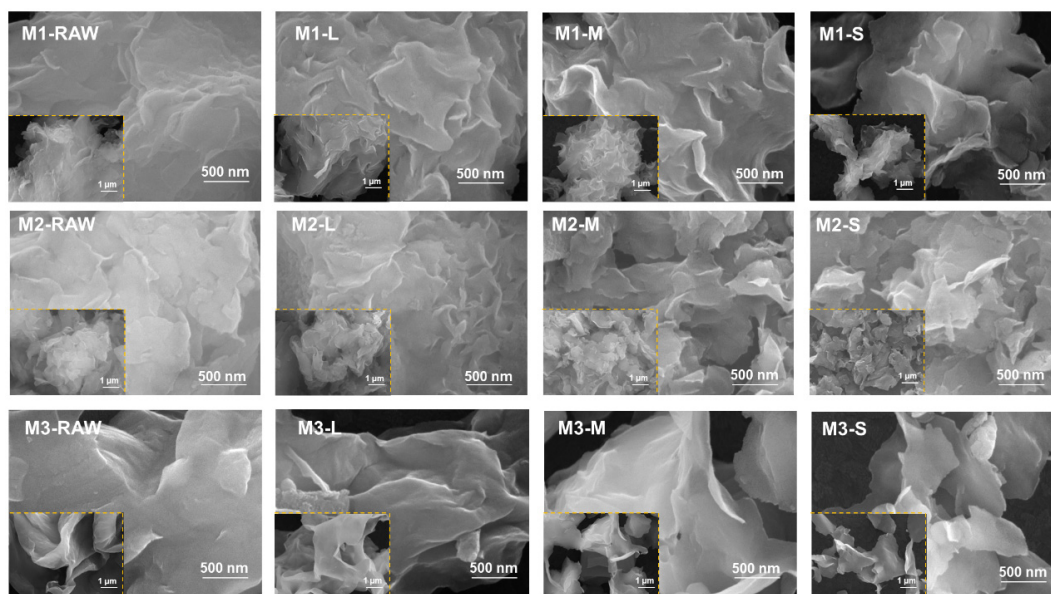

**Figure S1** SEM toward refined montmorillonite with 50k $\times$  and 100k $\times$  magnification.

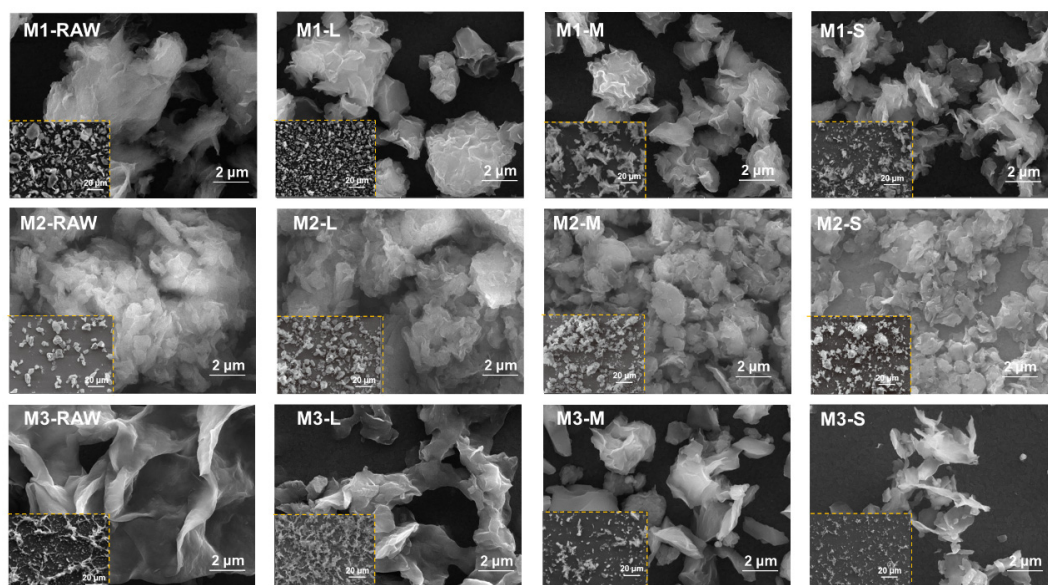

**Figure S2** SEM toward refined montmorillonite with 2k× and 20k× magnification.

**Table S1** XRD data toward M1

| Mineral            | Chemical Formula                                                       | JCPDS Card No. | 2 $\theta$ | h k l |
|--------------------|------------------------------------------------------------------------|----------------|------------|-------|
| Ca-montmorillonite | $\text{Ca}_{0.2}(\text{Al,Mg})_2\text{Si}_4\text{O}_{10}(\text{OH})_2$ | 00-058-2007    | 5.84       | 001   |
| Ca-montmorillonite | $\text{Ca}_{0.2}(\text{Al,Mg})_2\text{Si}_4\text{O}_{10}(\text{OH})_2$ | 00-058-2007    | 19.79      | 100   |
| Ca-montmorillonite | $\text{Ca}_{0.2}(\text{Al,Mg})_2\text{Si}_4\text{O}_{10}(\text{OH})_2$ | 00-058-2007    | 35.17      | 110   |
| Ca-montmorillonite | $\text{Ca}_{0.2}(\text{Al,Mg})_2\text{Si}_4\text{O}_{10}(\text{OH})_2$ | 00-058-2007    | 53.98      | 210   |
| Ca-montmorillonite | $\text{Ca}_{0.2}(\text{Al,Mg})_2\text{Si}_4\text{O}_{10}(\text{OH})_2$ | 00-058-2007    | 61.88      | 300   |
| Cristobalite       | $\text{SiO}_2$                                                         | 00-039-1425    | 21.86      | 101   |
| Quartz low         | $\text{SiO}_2$                                                         | 01-070-2537    | 22.75      | 101   |
| Albite             | $\text{Na}(\text{Si}_3\text{Al})\text{O}_8$                            | 00-010-0393    | 27.97      | 011   |
| Illite-1M          | $\text{K}_{0.7}\text{Al}_2(\text{Si,Al})_4\text{O}_{10}(\text{OH})_2$  | 00-029-1496    | 73.02      | 117   |

**Table S2** XRD data toward M2

| Mineral            | Chemical Formula                                                                         | JCPDS Card No. | 2 $\theta$ | h k l |
|--------------------|------------------------------------------------------------------------------------------|----------------|------------|-------|
| Ca-montmorillonite | Ca <sub>0.2</sub> (Al,Mg) <sub>2</sub> Si <sub>4</sub> O <sub>10</sub> (OH) <sub>2</sub> | 00-058-2007    | 5.89       | 001   |
| Ca-montmorillonite | Ca <sub>0.2</sub> (Al,Mg) <sub>2</sub> Si <sub>4</sub> O <sub>10</sub> (OH) <sub>2</sub> | 00-058-2007    | 19.79      | 100   |
| Ca-montmorillonite | Ca <sub>0.2</sub> (Al,Mg) <sub>2</sub> Si <sub>4</sub> O <sub>10</sub> (OH) <sub>2</sub> | 00-058-2007    | 35.08      | 110   |
| Ca-montmorillonite | Ca <sub>0.2</sub> (Al,Mg) <sub>2</sub> Si <sub>4</sub> O <sub>10</sub> (OH) <sub>2</sub> | 00-058-2007    | 53.95      | 210   |
| Ca-montmorillonite | Ca <sub>0.2</sub> (Al,Mg) <sub>2</sub> Si <sub>4</sub> O <sub>10</sub> (OH) <sub>2</sub> | 00-058-2007    | 62.09      | 300   |
| Brucite            | Mg(OH) <sub>2</sub>                                                                      | 00-007-02339   | 18.61      | 001   |
| Brucite            | Mg(OH) <sub>2</sub>                                                                      | 00-007-02339   | 38.00      | 101   |
| Brucite            | Mg(OH) <sub>2</sub>                                                                      | 00-007-02339   | 50.82      | 102   |
| Brucite            | Mg(OH) <sub>2</sub>                                                                      | 00-007-02339   | 58.66      | 110   |
| Brucite            | Mg(OH) <sub>2</sub>                                                                      | 00-007-02339   | 68.35      | 103   |
| Cristobalite       | SiO <sub>2</sub>                                                                         | 00-039-1425    | 21.97      | 101   |
| Quartz             | SiO <sub>2</sub>                                                                         | 00-033-1161    | 26.68      | 101   |
| Calcite            | CaCO <sub>3</sub>                                                                        | 00-047-1743    | 29.51      | 104   |
| Illite-1M          | K <sub>0.7</sub> Al <sub>2</sub> (Si,Al) <sub>4</sub> O <sub>10</sub> (OH) <sub>2</sub>  | 00-029-1496    | 73.02      | 117   |

**Table S3** XRD data toward M3

| Mineral            | Chemical Formula                                                                                 | JCPDS Card No. | 2 $\theta$ | h k l |
|--------------------|--------------------------------------------------------------------------------------------------|----------------|------------|-------|
| Na-montmorillonite | $\text{Na}_{0.3}(\text{Al,Mg})_2\text{Si}_4\text{O}_{10}(\text{OH})_2 \cdot 4\text{H}_2\text{O}$ | 00-029-1498    | 6.45       | 001   |
| Na-montmorillonite | $\text{Na}_{0.3}(\text{Al,Mg})_2\text{Si}_4\text{O}_{10}(\text{OH})_2 \cdot 4\text{H}_2\text{O}$ | 00-029-1498    | 19.86      | 100   |
| Na-montmorillonite | $\text{Na}_{0.3}(\text{Al,Mg})_2\text{Si}_4\text{O}_{10}(\text{OH})_2 \cdot 4\text{H}_2\text{O}$ | 00-029-1498    | 34.85      | 105   |
| Na-montmorillonite | $\text{Na}_{0.3}(\text{Al,Mg})_2\text{Si}_4\text{O}_{10}(\text{OH})_2 \cdot 4\text{H}_2\text{O}$ | 00-029-1498    | 54.08      | 210   |
| Na-montmorillonite | $\text{Na}_{0.3}(\text{Al,Mg})_2\text{Si}_4\text{O}_{10}(\text{OH})_2 \cdot 4\text{H}_2\text{O}$ | 00-029-1498    | 62.01      | 300   |
| Quartz             | $\text{SiO}_2$                                                                                   | 00-046-1045    | 26.74      | 101   |
| Albite             | $\text{Na}(\text{Si}_3\text{Al})\text{O}_8$                                                      | 00-010-0393    | 28.07      | 002   |
| Illite-1M          | $\text{K}_{0.7}\text{Al}_2(\text{Si,Al})_4\text{O}_{10}(\text{OH})_2$                            | 00-029-1496    | 73.04      | 117   |
